# Supplementary material for: Symmetry of ictal slow waves may predict the outcomes of corpus callosotomy for epileptic spasms
Source: PubMed Central journal article supplement (PMC6930281; doi:10.1038/s41598-019-56303-3), 2019-12-24
Supplement: 41598_2019_56303_MOESM1_ESM.pdf [file 41598_2019_56303_MOESM1_ESM.pdf]

# **Symmetry of ictal slow waves may predict the outcomes of corpus callosotomy for epileptic spasms**

Sotaro Kanai, Masayoshi Oguri, Tohru Okanishi, Shinji Itamura, Shimpei Baba,  
Mitsuyo Nishimura, Yoichiro Homma, Yoshihiro Maegaki, Hideo Enoki, Ayataka Fujimoto

**Supplementary Table S1. Results of EEG and EMG analyses**

| Patient | Number of ES/TS | Main distribution | Mean negative peak delay (ms) | Mean amplitude ratio | Mean duration ratio | Mean EMG latency (ms) | Mean EMG delay (ms) | Outcome of Engel's classification |
|---------|-----------------|-------------------|-------------------------------|----------------------|---------------------|-----------------------|---------------------|-----------------------------------|
| 1       | 10              | Occ.              | 40                            | 1.15                 | 1.18                | 115                   | 46.4                | I                                 |
| 2       | 6               | Temp.             | 40                            | 1.12                 | 1.1                 | 63                    | 77.2                | I                                 |
| 3       | 7               | Occ.              | 29                            | 1.35                 | 1.1                 | 40                    | 47.9                | I                                 |
| 4       | 11              | Occ.              | 15                            | 1.22                 | 1.08                | 121                   | 26.5                | I                                 |
| 5       | 10              | Temp.             | 32                            | 1.19                 | 1.05                | 19                    | 18.6                | I                                 |
| 6       | 5               | Temp.             | 28                            | 1.21                 | 1.11                | 134                   | 13                  | I                                 |
| 7       | 15              | Occ.              | 23                            | 1.14                 | 1.07                | 216                   | 81.3                | I                                 |
| 8       | 10              | Temp.             | 68                            | 1.89                 | 1.59                | 104                   | 44.9                | II                                |
| 9       | 9               | Temp.             | 250                           | 1.4                  | 1.29                | 122                   | 72.3                | II                                |
| 10      | 11              | C-P               | 56                            | 1.63                 | 1.2                 | 111                   | 57.5                | III                               |
| 11      | 7               | Front.            | 80                            | 2.59                 | 1.39                | 177                   | 27.1                | III                               |
| 12      | 12              | Occ.              | 126                           | 1.75                 | 1.24                | 145                   | 142.3               | III                               |
| 13      | 4               | Occ.              | 38                            | 1.36                 | 1.24                | 95                    | 57                  | III                               |
| 14      | 11              | C-P               | 59                            | 2.32                 | 1.53                | 31                    | 57.6                | IV                                |
| 15      | 4               | Front.            | 85                            | 1.76                 | 1.24                | 93                    | 68.8                | IV                                |
| 16      | 11              | Temp.             | 287                           | 1.85                 | 1.47                | 215                   | 58.7                | IV                                |
| 17      | 12              | C-P               | 52.9                          | 2.41                 | 1.34                | 168                   | 56                  | IV                                |

EEG, electroencephalogram; EMG, electromyography; ES, epileptic spasms; TS, tonic spasms; Occ., occipital; Temp., temporal; C-P, central-parietal; Front., frontal.
